# Supplementary material for: Multiphoton photochemical crosslinking-based fabrication of protein micropatterns with controllable mechanical properties for single cell traction force measurements
Source: PubMed Central journal article supplement (PMC4730236; doi:10.1038/srep20063), 2016-01-28
Supplement: srep20063-s1.pdf [file srep20063-s1.pdf]

# **Multiphoton photochemical crosslinking-based fabrication of protein micropatterns with controllable mechanical properties for single cell traction force measurements**

Ming Hui Tong<sup>1</sup>, Nan Huang<sup>1</sup>, Wei Zhang<sup>1</sup>, Zhuo Long Zhou<sup>2</sup>, Alfonso Hing Wan Ngan<sup>2</sup>, Yanan Du<sup>3</sup>, Barbara Pui Chan<sup>1,\*</sup>

<sup>1</sup>Tissue Engineering Laboratory, Department of Mechanical Engineering, The University of Hong Kong, Pokfulam Road, Hong Kong Special Administrative Region, China.

<sup>2</sup>Department of Mechanical Engineering, The University of Hong Kong, Pokfulam Road, Hong Kong Special Administrative Region, China.

<sup>3</sup>Department of Biomedical Engineering, School of Medicine, Tsinghua University, Beijing, 100084, China

\*Corresponding author: bpchan@hku.hk

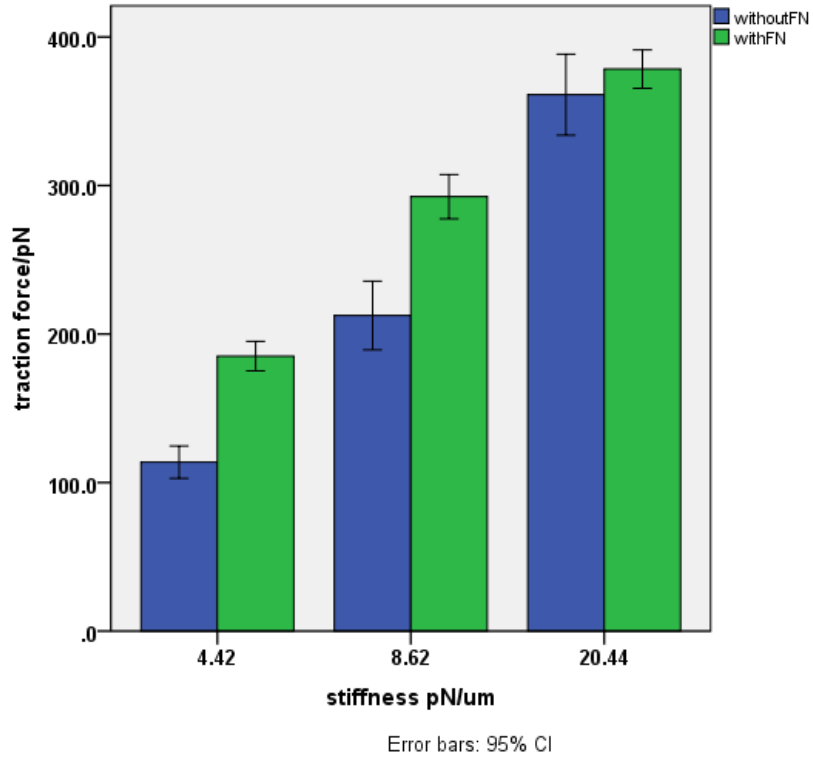

**Supplementary Figure 1** – Traction force of human dermal fibroblast on micropillars with and without fibronectin coating.

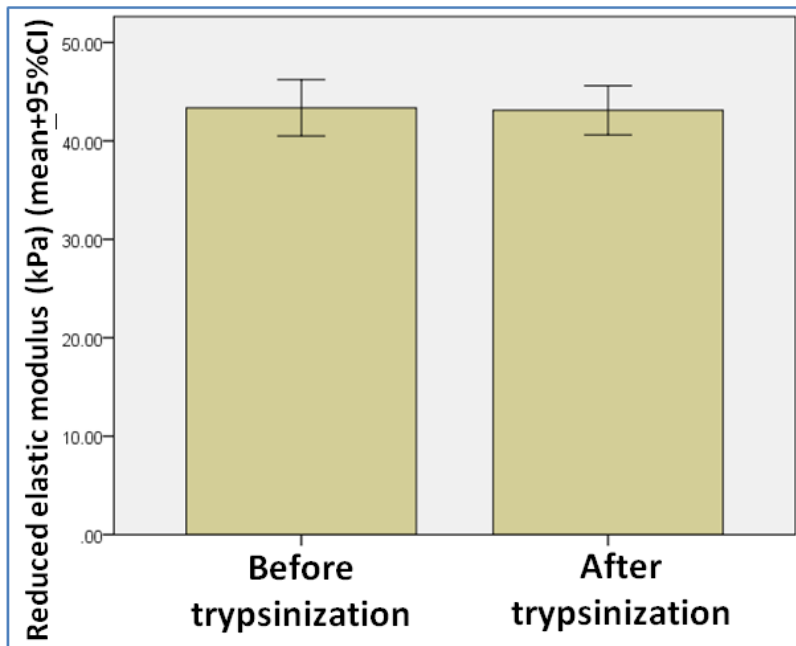

**Supplementary Figure 2** – Measurement of the reduced elastic modulus before and after trypsinization.
